# Supplementary material
Source: publisher figshare collection journal article supplement (https://acs.figshare.com/ndownloader/files/22276272)
Supplement: Supplementary file 1 [file 22276272]

# Supporting Information

## Structural Isomerism Effect in Platinum(II) Acetylide-Based Supramolecular Polymers

Ze Chen, Yuncong Xue, Mingliang Gui, Cong Wang, and Feng Wang\*

*CAS Key Laboratory of Soft Matter Chemistry, Department of Polymer Science and Engineering, University of Science and Technology of China, Hefei, Anhui 230026 P. R. China, E-mail: [drfwang@ustc.edu.cn](mailto:drfwang@ustc.edu.cn).*

|    |                                                                           |     |
|----|---------------------------------------------------------------------------|-----|
| 1. | <i>Spectra of 1–2 at the monomeric state</i>                              | S2  |
| 2. | <i>Supramolecular polymerization of 2</i>                                 | S3  |
| 3. | <i>Supramolecular polymerization of 1</i>                                 | S7  |
| 4. | <i>Thermal hysteresis for supramolecular polymerization of 1–2</i>        | S11 |
| 5. | <i>Macroscopic gelation of 1–2</i>                                        | S13 |
| 6. | <i>Structural characterization of 1–2 and the synthetic intermediates</i> | S14 |

# 1. Spectra of **1–2** at the monomeric state

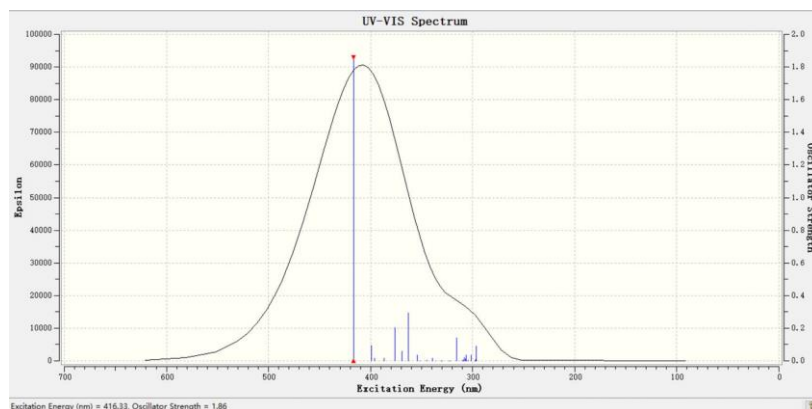

**Figure S1.** Simulated UV–Vis spectrum of **1** in chloroform *via* TD-DFT calculation.

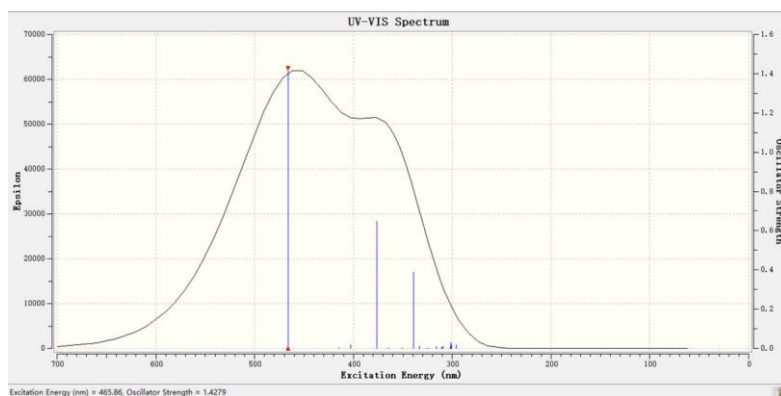

**Figure S2.** Simulated UV–Vis spectrum of **2** in chloroform *via* TD-DFT calculation.

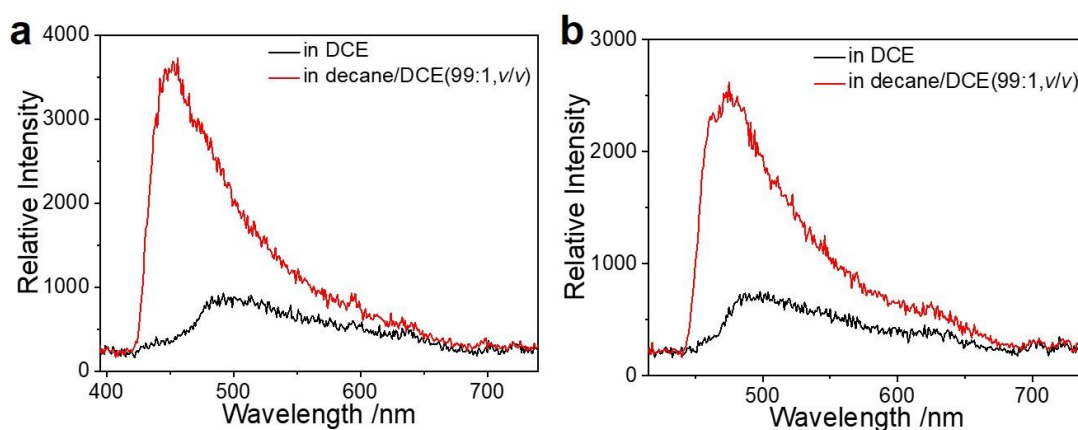

**Figure S3.** Emission spectra of (a) **1** ( $\lambda_{\text{ex}} = 380$  nm) and (b) **2** ( $\lambda_{\text{ex}} = 420$  nm) in 1,2-dichloroethane (black lines) and decane/1,2-dichloroethane (99 : 1, v/v) (red lines).

## 2. Supramolecular polymerization of **2**

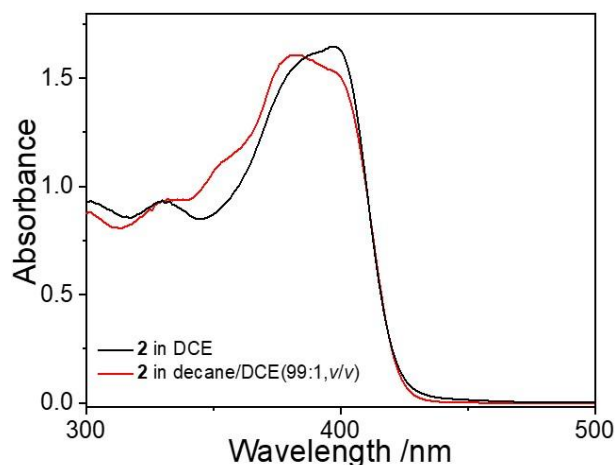

**Figure S4.** UV–Vis spectra of **2** ( $c = 0.05$  mM, 293 K) in 1,2-dichloroethane and decane/1,2-dichloroethane (99 : 1, v/v). It shows slight hypochromic effect in the apolar medium [ $\lambda_{\text{max}}$ : from 420 in 1,2-dichloroethane to 416 nm in decane/1,2-dichloroethane (99 : 1, v/v)].

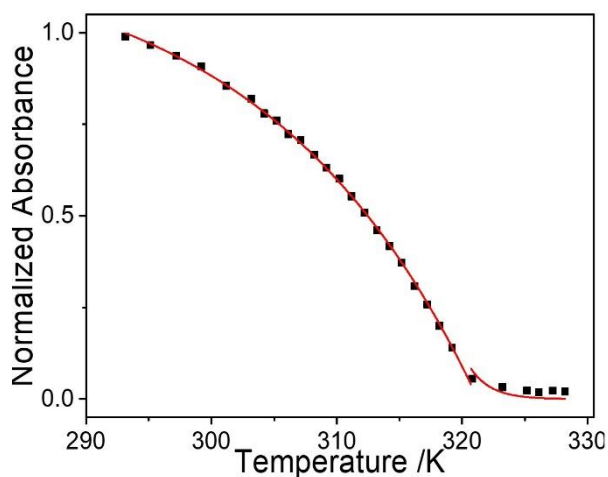

**Figure S5.** Normalized UV–Vis absorbance of **2** at 358 nm *versus* temperature upon heating (rate: 60 K h<sup>-1</sup>). Condition:  $c = 0.05$  mM, decane/1,2-dichloroethane (99 : 1, v/v), 5 mm cuvette. The solid lines denote Meijer–Schenning–van der Schoot mathematical model fitting of the curve.

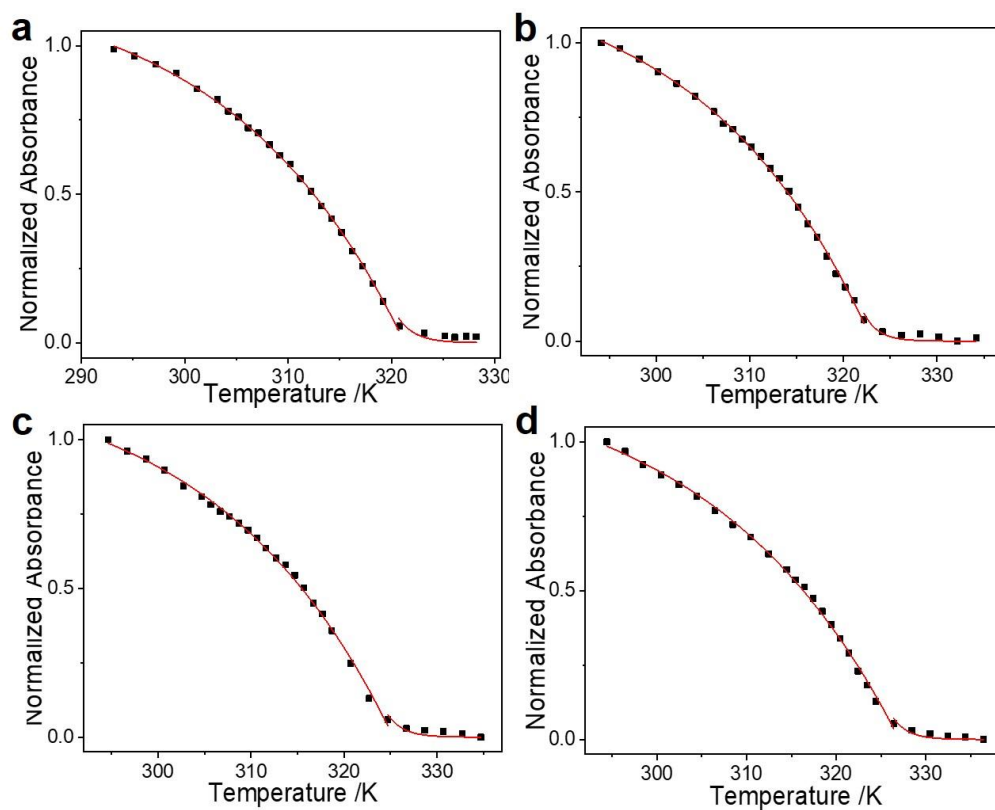

**Figure S6.** Normalized UV–Vis absorbance intensity of **2** at 358 nm in decane/1,2-dichloroethane (99 : 1, v/v) at different monomer concentration: a) 0.05 mM; b) 0.06 mM; c) 0.07 mM; d) 0.08 mM. The solid lines denote mathematical fitting of the curves by Meijer–Schenning–van der Schoot model. The quantitative thermodynamic values are shown in **Table S1**.

**Table S1.** Thermodynamic parameters of **2** obtained by fitting temperature-dependent UV–Vis data.

| <b>2</b>                      | 0.05 mM | 0.06 mM | 0.07 mM | 0.08 mM |
|-------------------------------|---------|---------|---------|---------|
| $T_e$ (K)                     | 320.8   | 323.1   | 325.3   | 327.0   |
| $h_e$ (kJ mol <sup>-1</sup> ) | -53.1   | -48.8   | -46.5   | -42.4   |

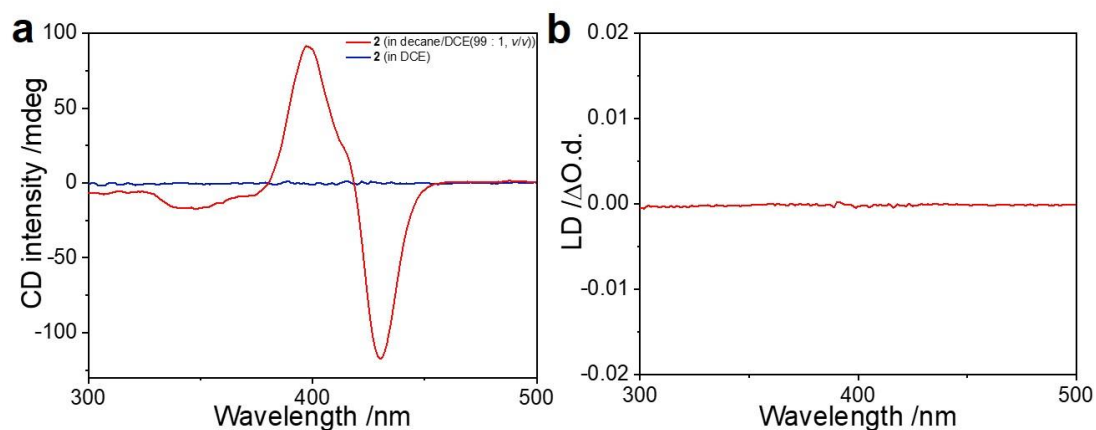

**Figure S7.** (a) CD spectra of **2** ( $c = 0.05$  mM, 293 K, 5 mm cuvette) in 1,2-dichloroethane and decane/1,2-dichloroethane (99 : 1, v/v). (b) LD spectrum of **2** [0.05 mM in decane/1,2-dichloroethane (99 : 1, v/v), 293K]. As can be seen, no LD signal is detected, demonstrating the measured CD signals are real to reflect the supramolecular chirality.

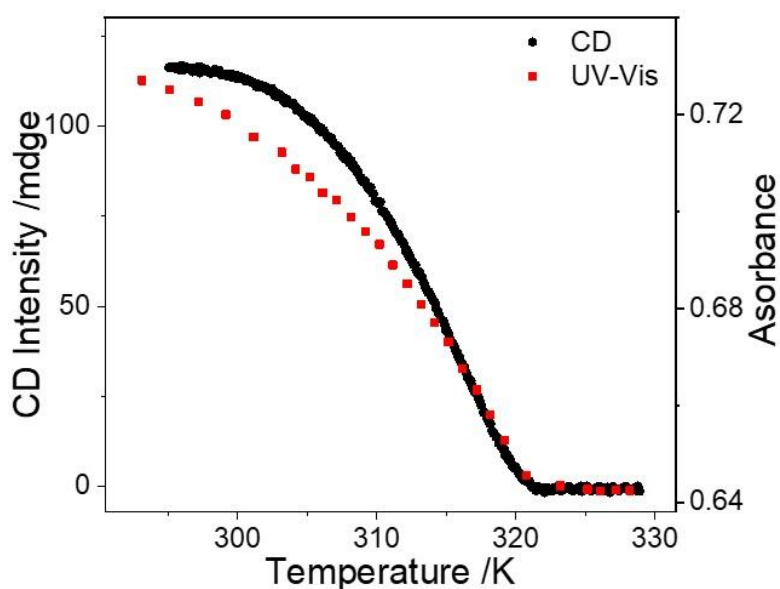

**Figure S8.** Overlapped normalized UV–Vis and CD intensity of **2** *versus* temperature in decane/1,2-dichloroethane (99 : 1, v/v,  $c = 0.05$  mM) at a heating rate of 60 K h<sup>-1</sup>.

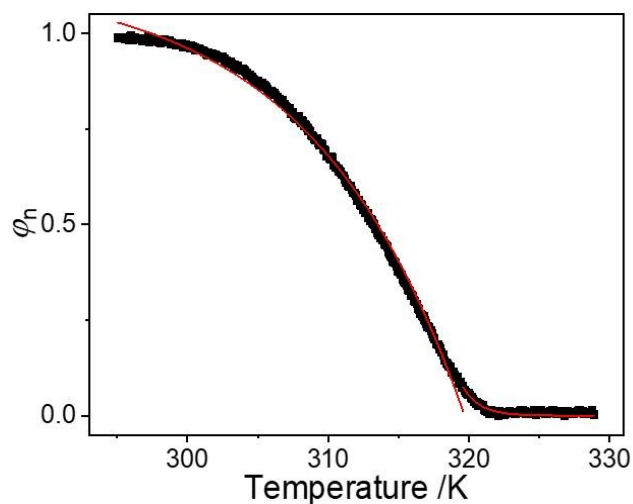

**Figure S9.** Normalized CD intensity of **2** *versus* temperature in decane/1,2-dichloroethane (99 : 1,  $v/v$ ,  $c = 0.05$  mM). The red solid lines denote the mathematical fitting of the melting curve by the Meijer–Schenning–van der Schoot mathematical model. The quantitative thermodynamic values are shown in **Table 1**.

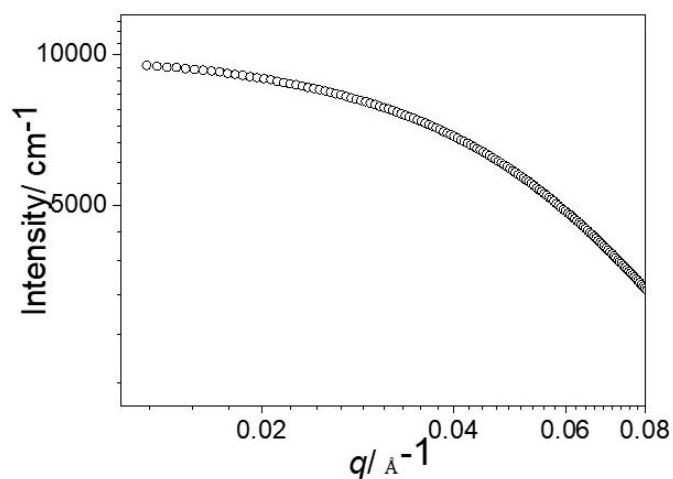

**Figure S10.** Plots of  $\log I(q)$  *versus*  $\log (q)$  of SAXS for **2** (0.10 mM in MCH). A  $q^{-1}$  slope is obtained in the region  $0.03 < q < 0.08 \text{ Å}^{-1}$ , indicating the formation of one-dimensional rod-like structure upon supramolecular polymerization.

### 3. Supramolecular polymerization of **1**

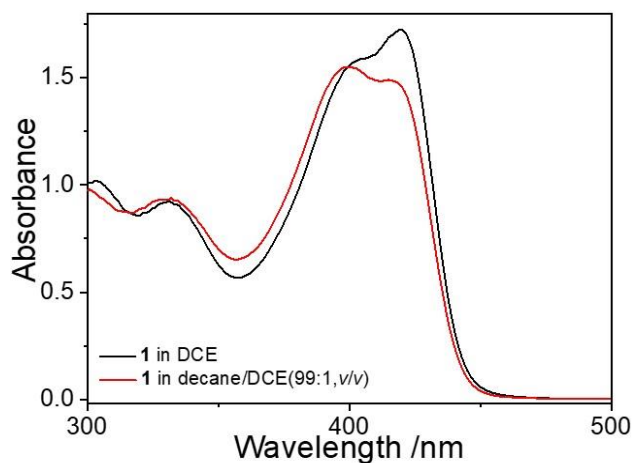

**Figure S11.** UV–Vis spectra of **1** ( $c = 0.05$  mM, 293 K) in 1,2-dichloroethane and decane/1,2-dichloroethane (99 : 1, v/v).

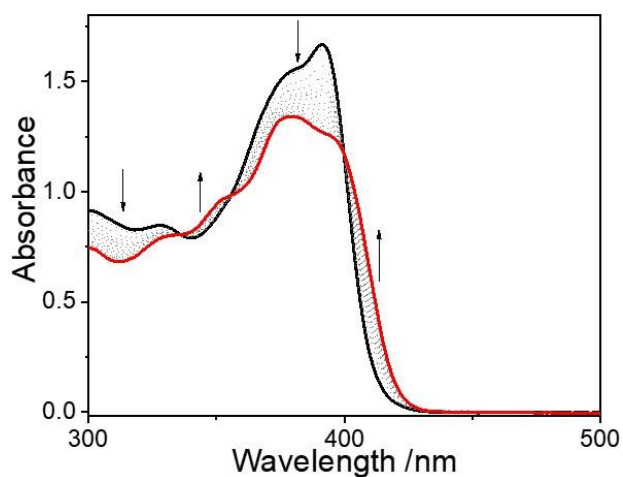

**Figure S12.** Temperature-dependent UV–Vis spectra of **1** ( $c = 0.05$  mM) in decane/1,2-dichloroethane (99 : 1, v/v). The arrows show spectral changes upon increasing the temperature. Three isosbestic points are present ( $\lambda$ : 335, 355 and 399 nm) upon varying the temperature in decane/1,2-dichloroethane (99 : 1, v/v), supporting reversible conversion between the monomeric and aggregated states.

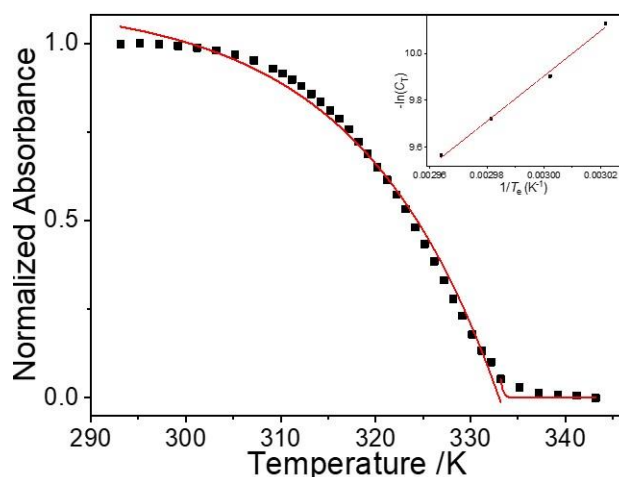

**Figure S13.** Normalized UV–Vis absorbance of **1** at 411 nm *versus* temperature upon heating (rate: 60 K h<sup>-1</sup>). Condition:  $c = 0.05$  mM, decane/1,2-dichloroethane (99 : 1, v/v), 5 mm cuvette. The solid lines denote Meijer–Schenning–van der Schoot mathematical model fitting of the curve. Inset: van’t Hoff plot fitting of **1**. The concentration is made dimensionless by dividing 10<sup>-5</sup> M.

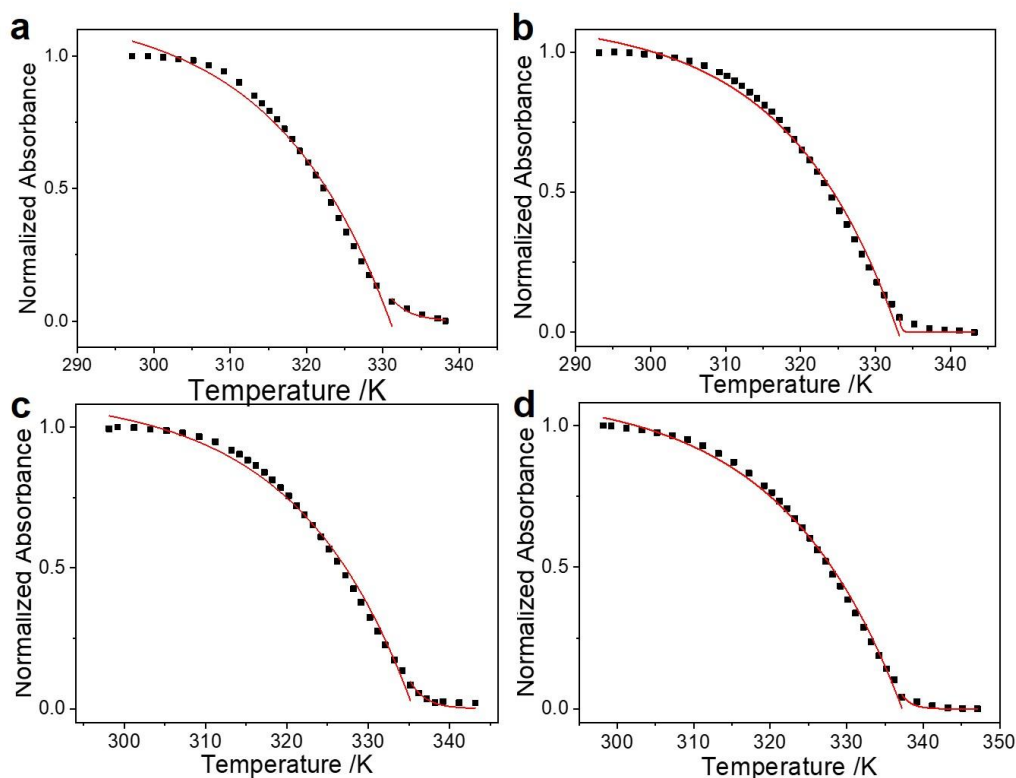

**Figure S14.** Normalized UV–Vis absorbance of **1** at 411 nm in decane/1,2-dichloroethane (99 : 1, v/v) at different monomer concentration: a) 0.04 mM; b) 0.05 mM; c) 0.06 mM; d) 0.07 mM. The solid lines denote Meijer–Schenning–van der Schoot mathematical fitting of the melting curves. The quantitative thermodynamic values are shown in **Table S2**.



**Table S2. Thermodynamic parameters of **1** obtained by fitting temperature-dependent UV-Vis data.**

| <b>1</b>                      | 0.04 mM | 0.05 mM | 0.06 mM | 0.07 mM |
|-------------------------------|---------|---------|---------|---------|
| $T_e$ (K)                     | 330.9   | 333.1   | 335.4   | 337.4   |
| $h_e$ (kJ mol <sup>-1</sup> ) | -60.3   | -62.3   | -62.9   | -59.5   |

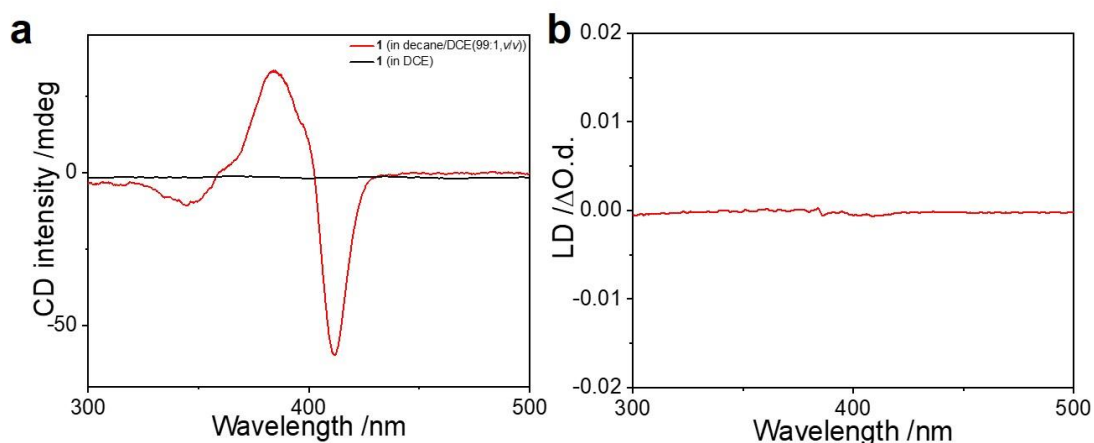

**Figure S15.** (a) CD spectra of **1** ( $c = 0.05$  mM, 293 K, 5 mm cuvette) in 1,2-dichloroethane and decane/1,2-dichloroethane (99 : 1, v/v). (b) LD spectrum of **1** [0.05 mM in decane/1,2-dichloroethane (99 : 1, v/v), 293K]. As can be seen, no LD signal is detected, demonstrating the measured CD signals are real to reflect the supramolecular chirality.

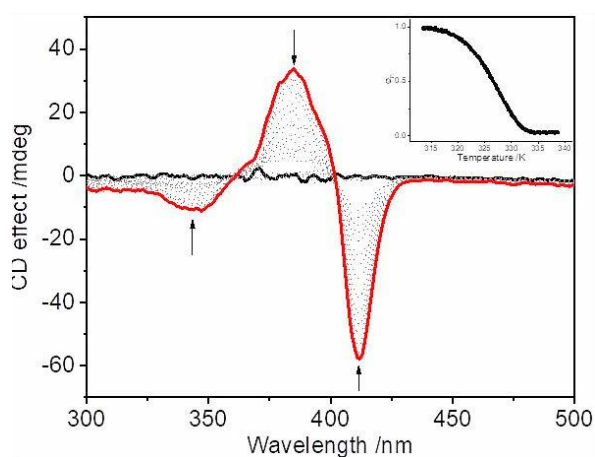

**Figure S16.** Temperature-dependent CD spectra of **1** in decane/1,2-dichloroethane (99 : 1, v/v). The arrows show spectral changes upon increasing the temperature. Inset: Normalized CD intensity of **1** at 411 nm *versus* temperature at a heating rate of 60 K h<sup>-1</sup>. The non-sigmoidal melting curve indicates that **1** tends to adopt nucleation–elongation cooperative self-assembly mechanism, leading to the formation of one-dimensional supramolecular polymers at the aggregated state.

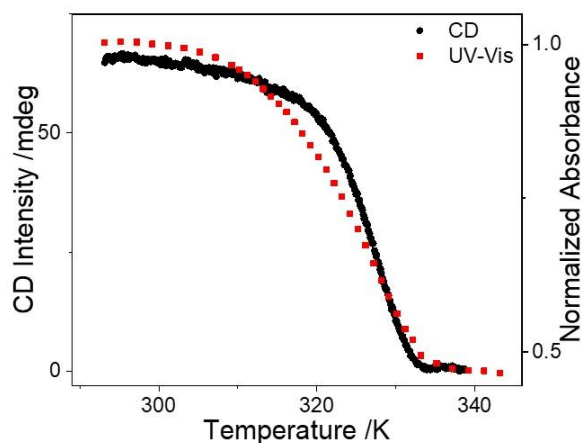

**Figure S17.** Overlapped normalized UV-Vis and CD intensity of **1** versus temperature in decane/1,2-dichloroethane (99 : 1, v/v,  $c = 0.05$  mM) at a heating rate of  $60\text{ K h}^{-1}$ .

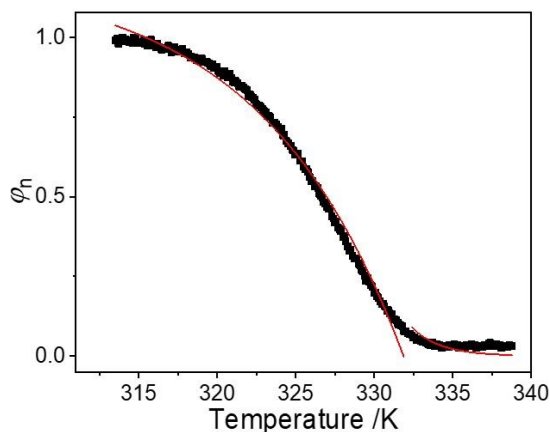

**Figure S18.** Normalized CD intensity of **1** at 411 nm *versus* temperature in decane/1,2-dichloroethane (99 : 1, v/v). The solid lines denote the mathematical fitting of the melting curve by the Meijer–Schenning–van der Schoot mathematical model.

The quantitative thermodynamic values are shown in **Table 1**.

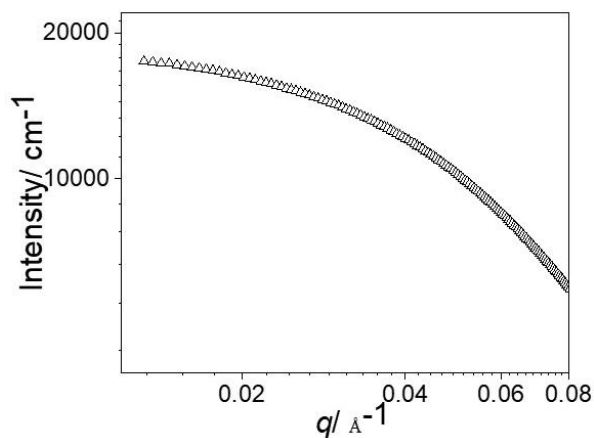

**Figure S19.** Plots of  $\log I(q)$  *versus*  $\log (q)$  of SAXS for **1** (0.1 mM in MCH). A  $q^{-1}$  slope is obtained in the region  $0.03 < q < 0.08\text{ Å}^{-1}$ , indicating the formation of one-dimensional rod-like structure upon supramolecular polymerization.

#### 4. Thermal hysteresis for supramolecular polymerization of **1**–**2**

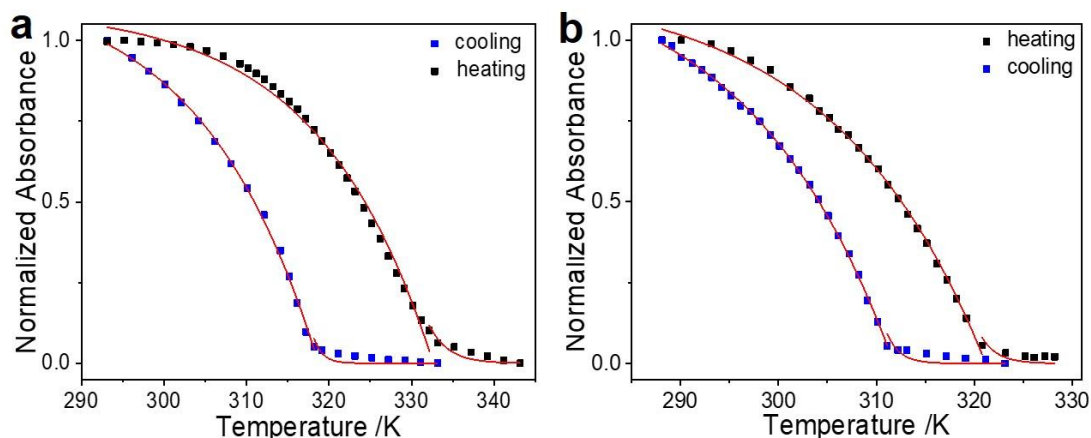

**Figure S20.** Normalized UV–Vis absorbance intensity of (a) **1** at 411 nm and (b) **2** at 358 nm *versus* temperature upon cooling (blue dots) and heating (black dots) at a rate of 60 K h<sup>−1</sup>. Condition:  $c = 0.05$  mM, decane/1,2-dichloroethane (99 : 1, v/v), 5 mm cuvette. The solid lines denote Meijer–Schenning–van der Schoot mathematical model fitting of the curves.

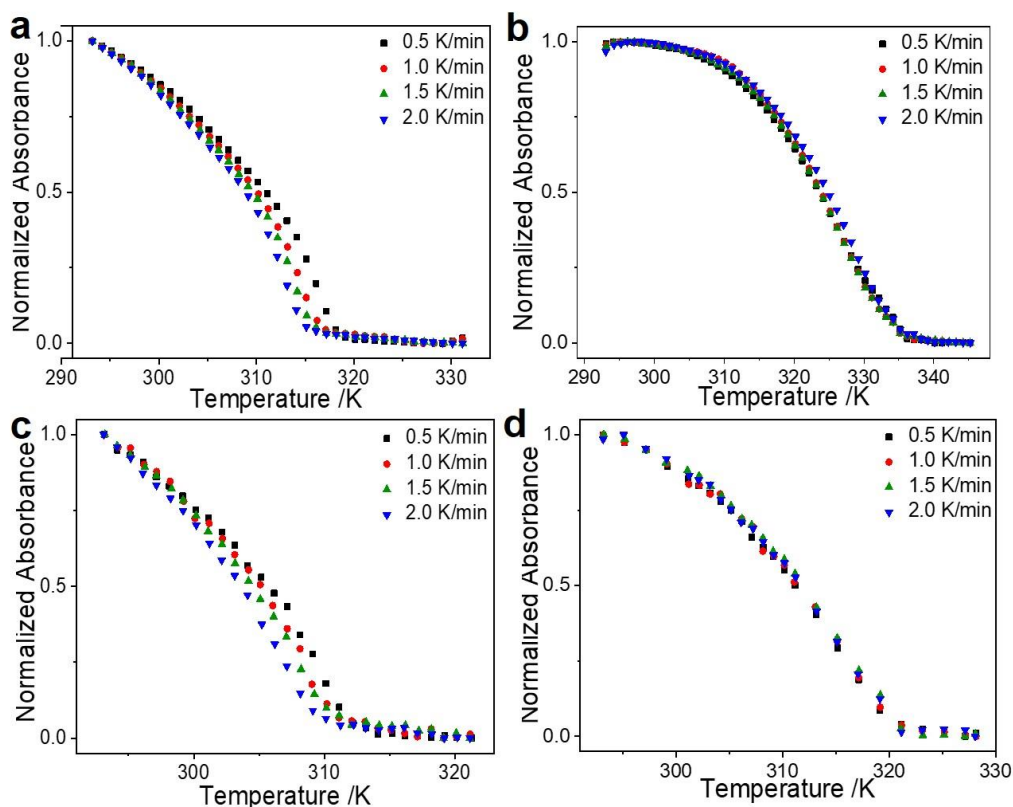

**Figure S21.** Normalized UV–Vis absorbance intensity of (a, b) **1** at 411 nm and (c, d) **2** at 358 nm *versus* temperature upon cooling (*left*) and heating (*right*) at different rates.

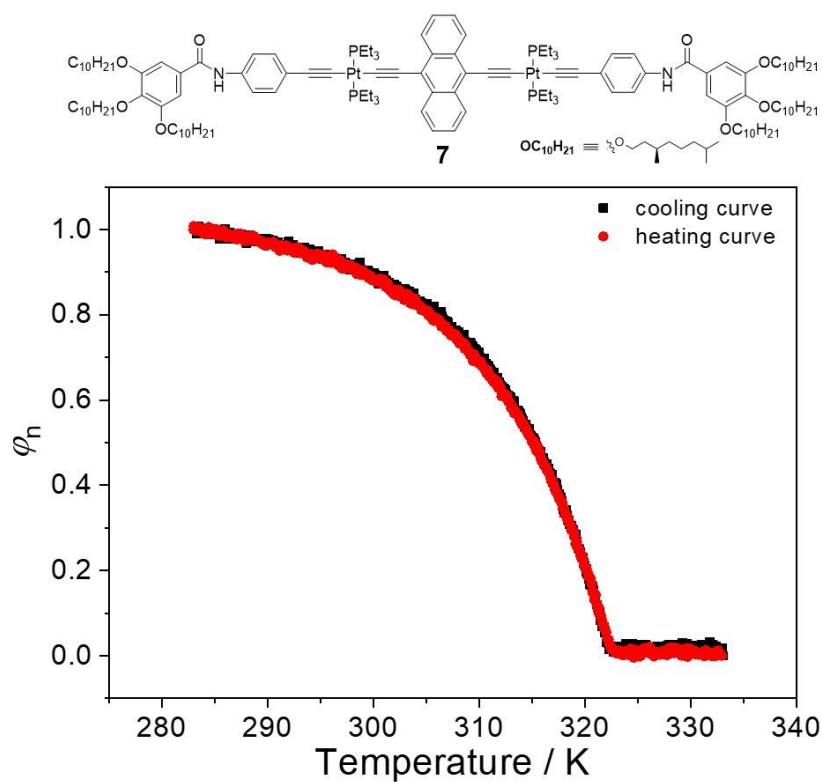

**Figure S22.** Normalized CD intensity of **7** at 489 nm *versus* temperature upon cooling (black dots) and heating (red dots) at a rate of 60 K h<sup>-1</sup>. No hysteresis phenomenon is observed.

## 5. Macroscopic gelation behaviors of 1–2

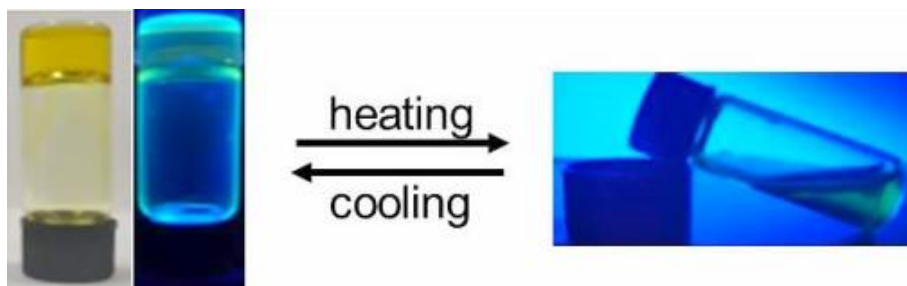

**Figure S23.** Thermo-responsive sol–gel transition of the supramolecular gels derived from **2**. The emission of supramolecular gels disappears upon heating, showing the “switching-on” emission character.

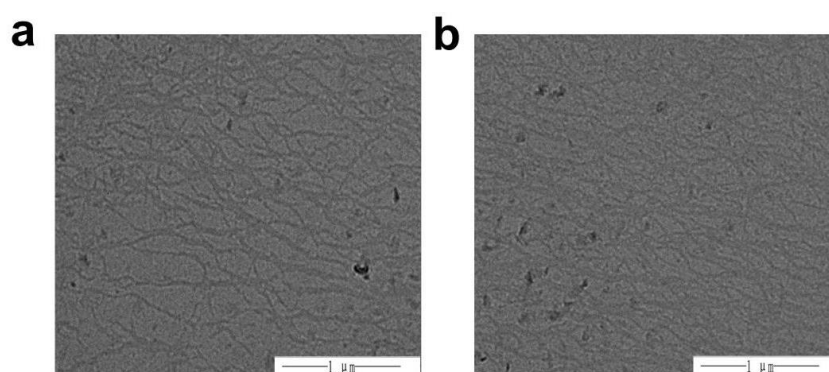

**Figure S24.** TEM images of (a) **1** and (b) **2** [copper grid, drop-casting from 0.40 mM solution in decane/1,2-dichloroethane (99 : 1, v/v)]. One-dimensional fibers are observed for **1** and **2**, laying the basis for the formation of three-dimensional supramolecular gels.

6. Structural characterization of **1–2** and the synthetic intermediates

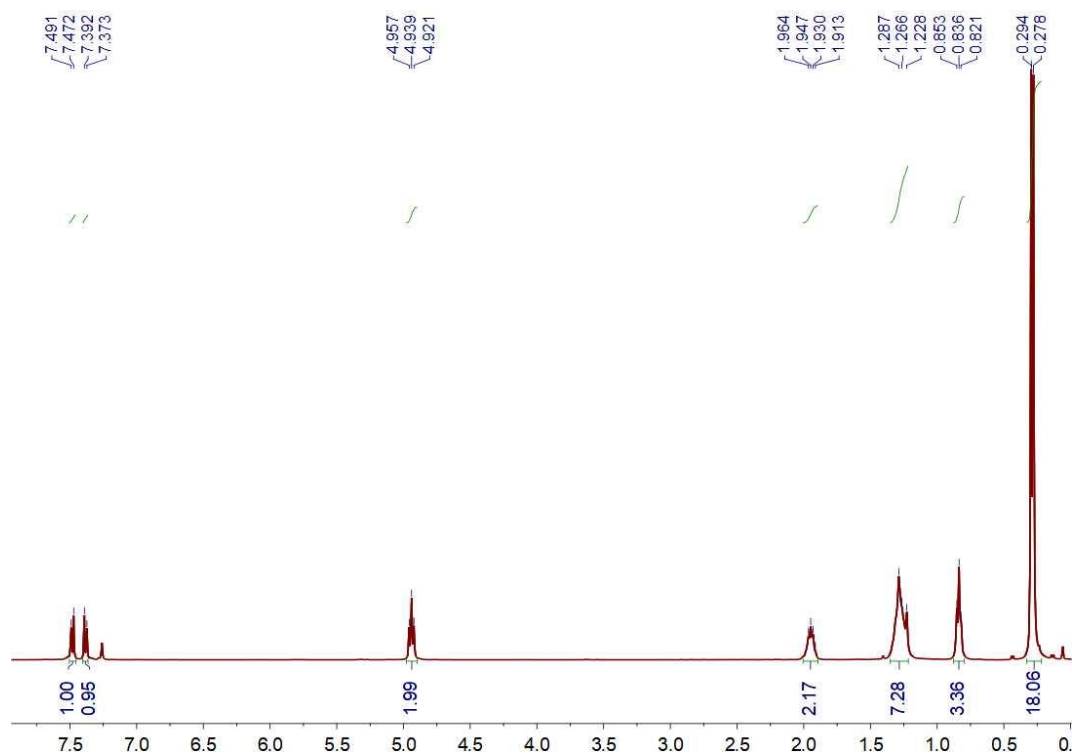

**Figure S25.** <sup>1</sup>H NMR spectrum (400 MHz, CDCl<sub>3</sub>, 298 K) of **4a**.

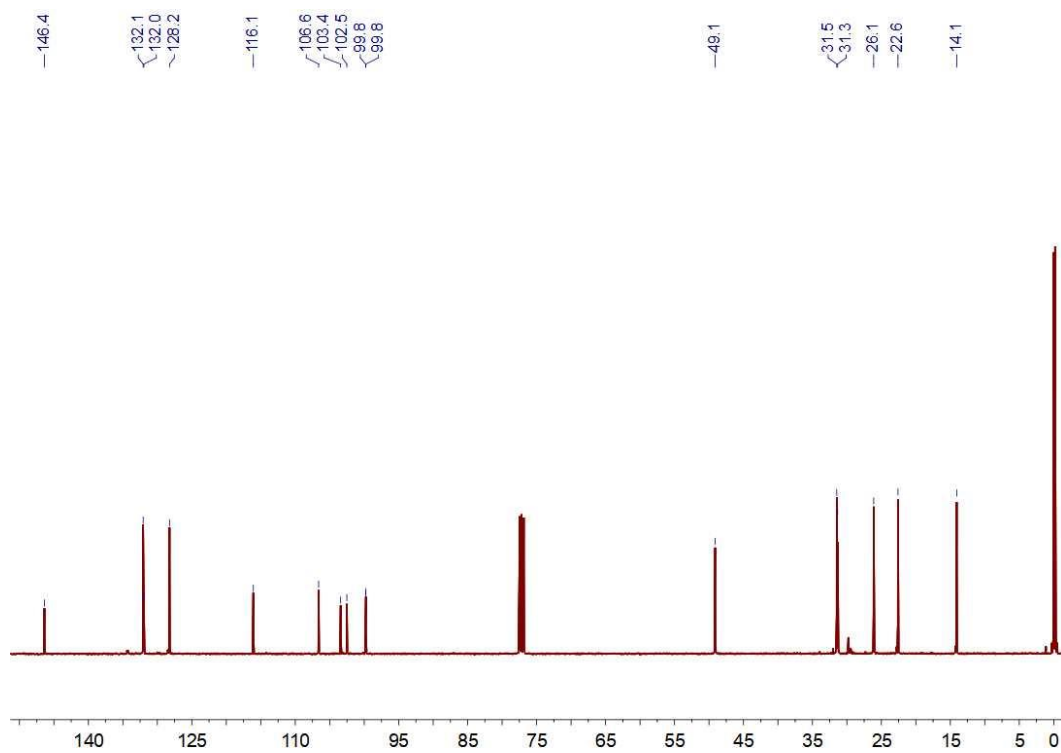

**Figure S26.** <sup>13</sup>C NMR spectrum (100 MHz, CDCl<sub>3</sub>, 298 K) of **4a**.

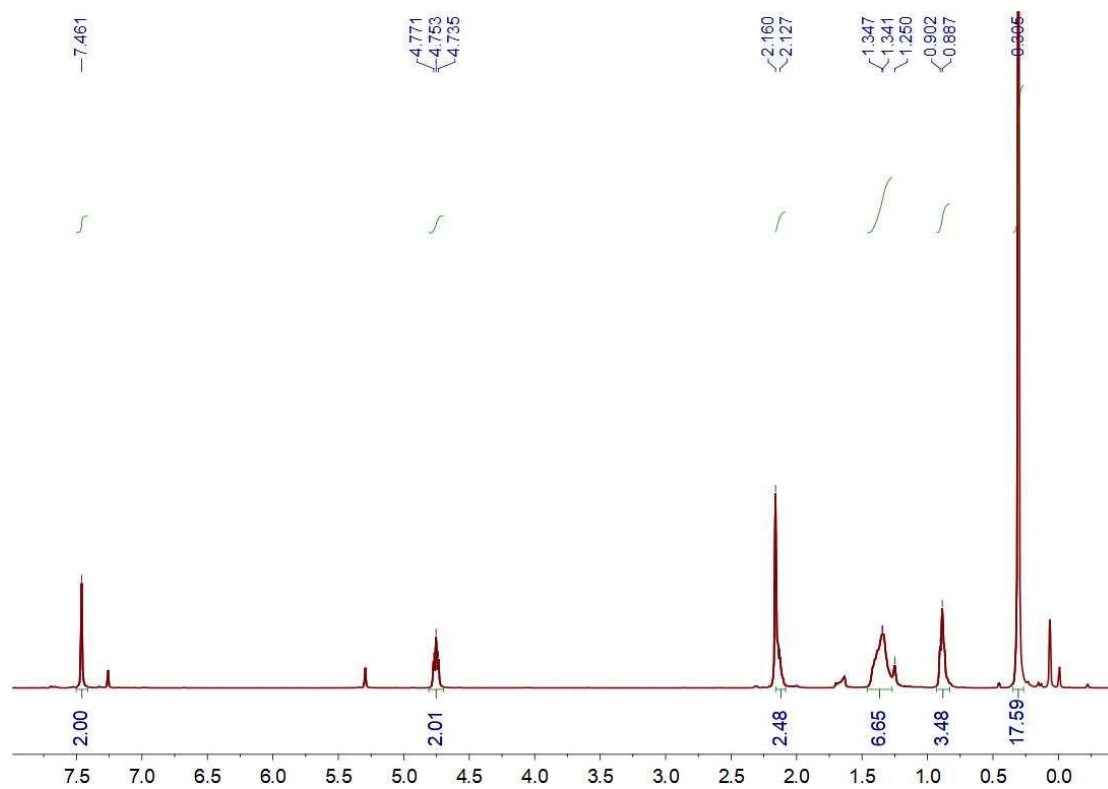

**Figure S27.** <sup>1</sup>H NMR spectrum (400 MHz, CDCl<sub>3</sub>, 298 K) of **4b**.

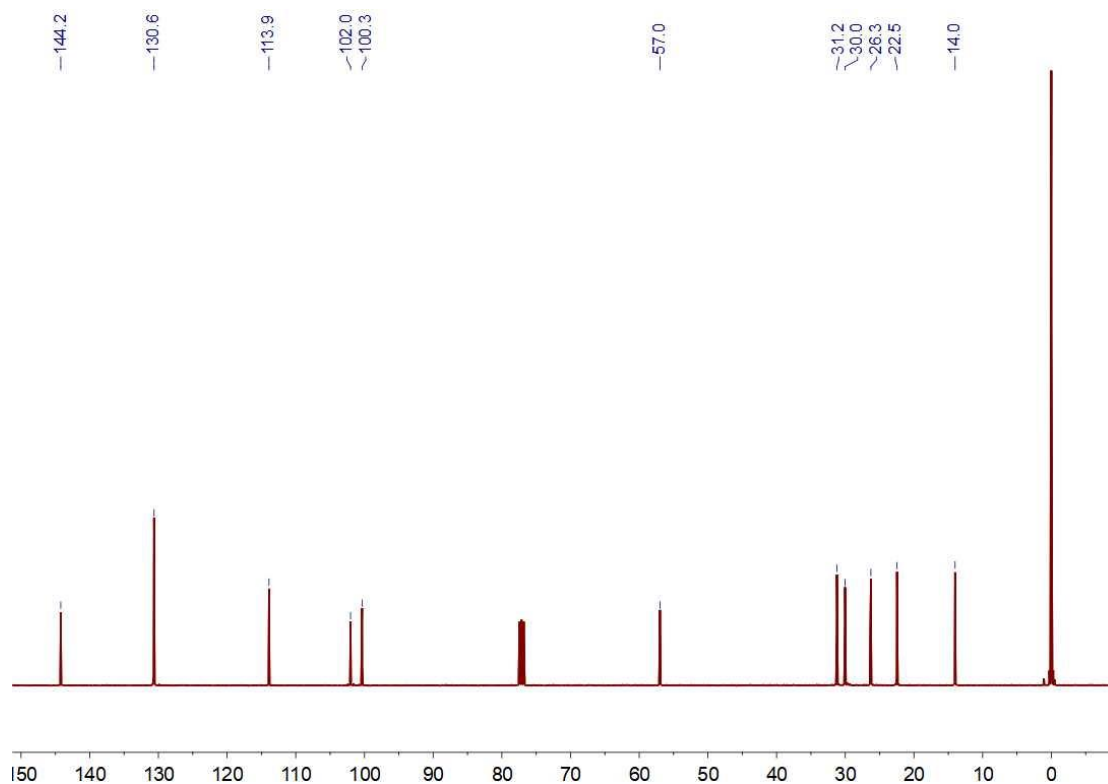

**Figure S28.** <sup>13</sup>C NMR spectrum (100 MHz, CDCl<sub>3</sub>, 298 K) of **4b**.

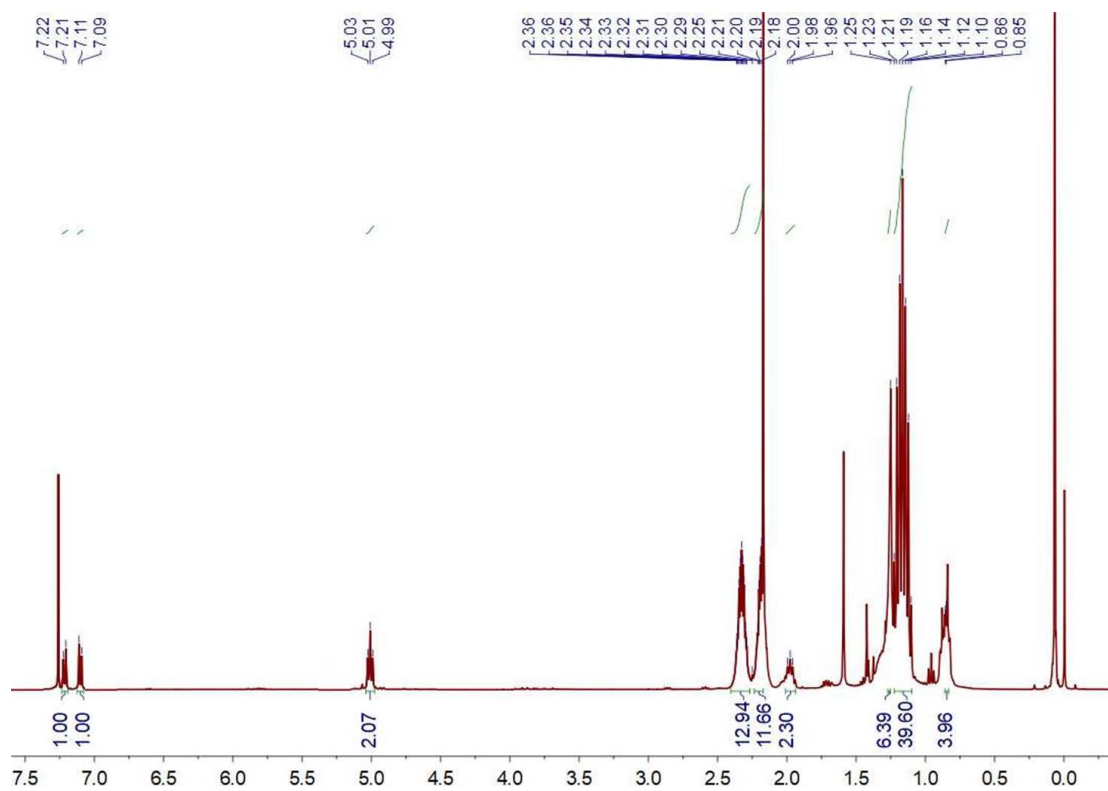

**Figure S29.**  $^1\text{H}$  NMR spectrum (400 MHz,  $\text{CDCl}_3$ , 298 K) of **5a**.

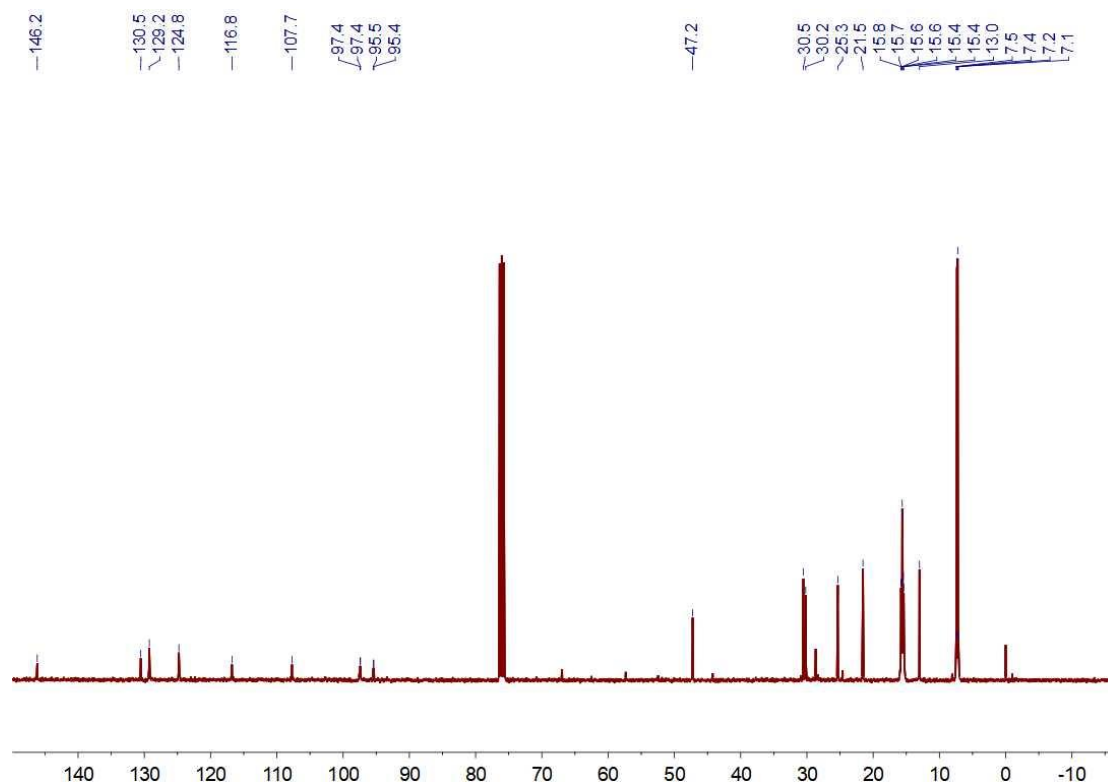

**Figure S30.**  $^{13}\text{C}$  NMR spectrum (100 MHz,  $\text{CDCl}_3$ , 298 K) of **5a**.



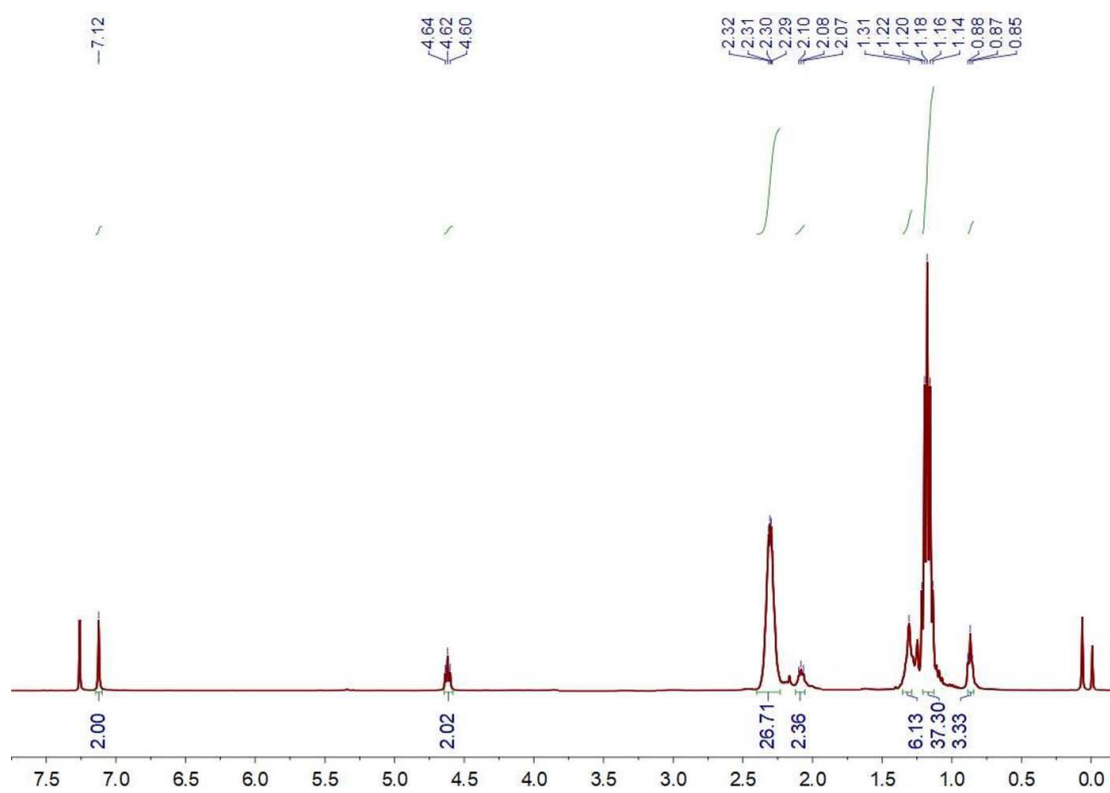

**Figure S31.** <sup>1</sup>H NMR spectrum (400 MHz, CDCl<sub>3</sub>, 298 K) of **5b**.

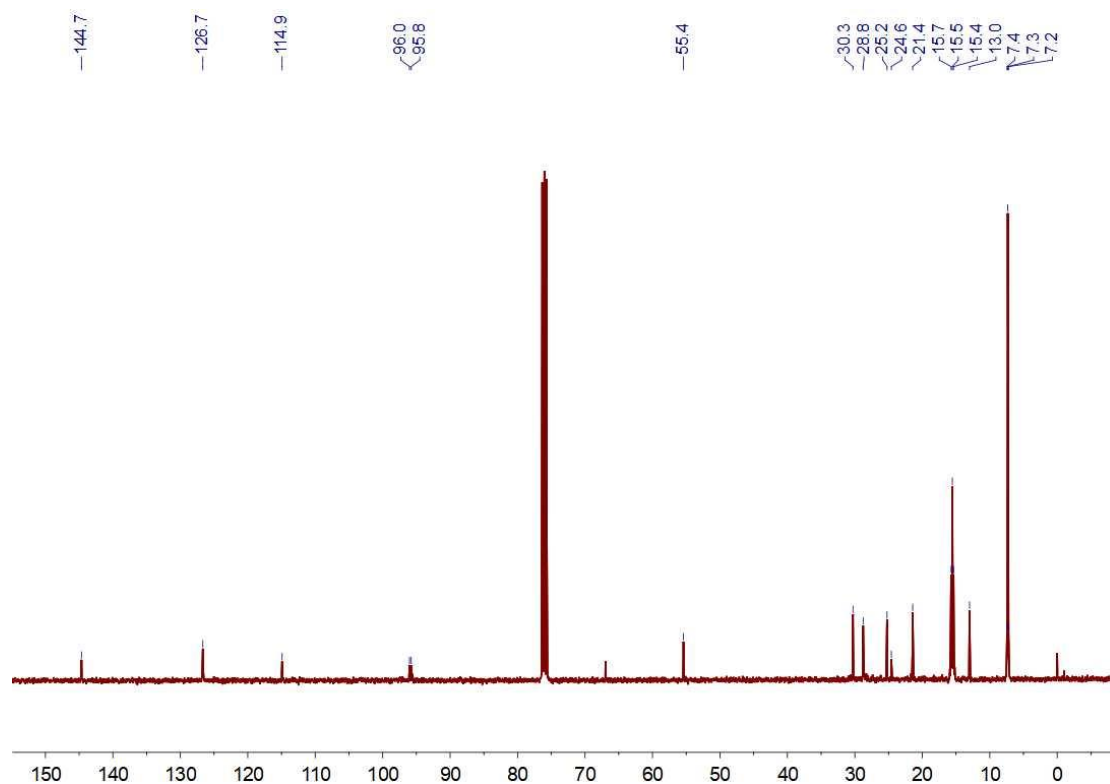

**Figure S32.** <sup>13</sup>C NMR spectrum (100 MHz, CDCl<sub>3</sub>, 298 K) of **5b**.

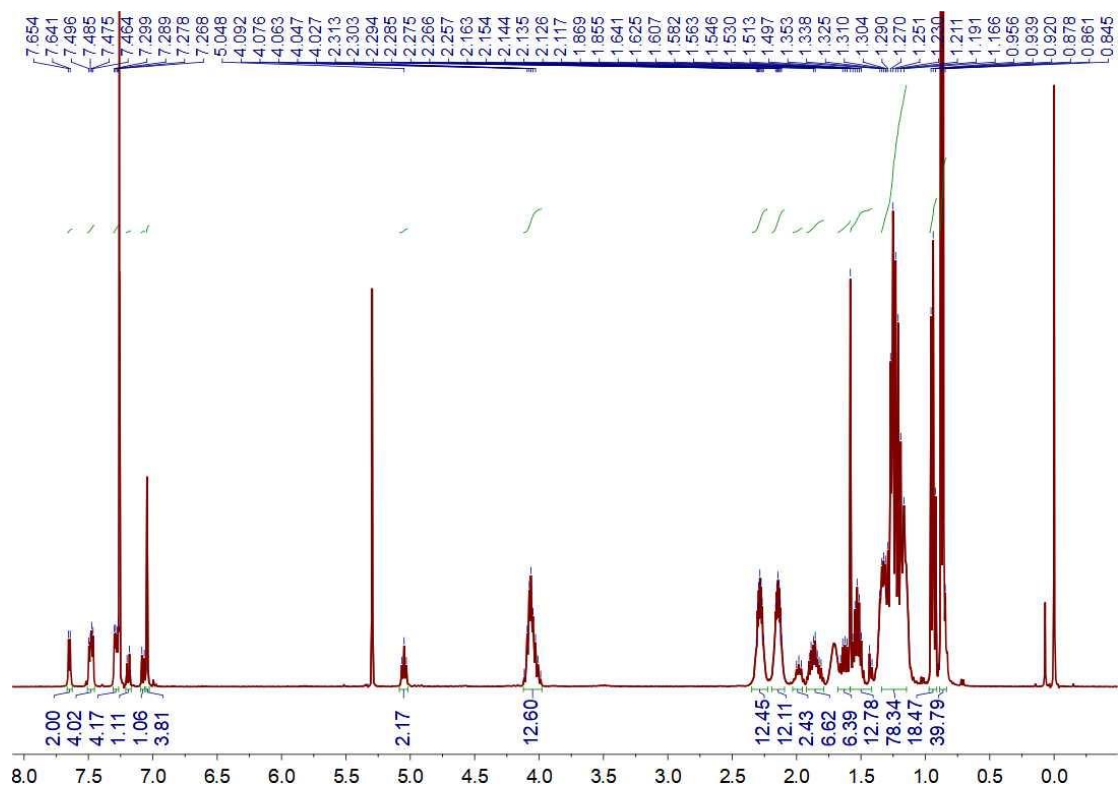

**Figure S33.**  $^1\text{H}$  NMR spectrum (400 MHz,  $\text{CDCl}_3$ , 298 K) of **1**.

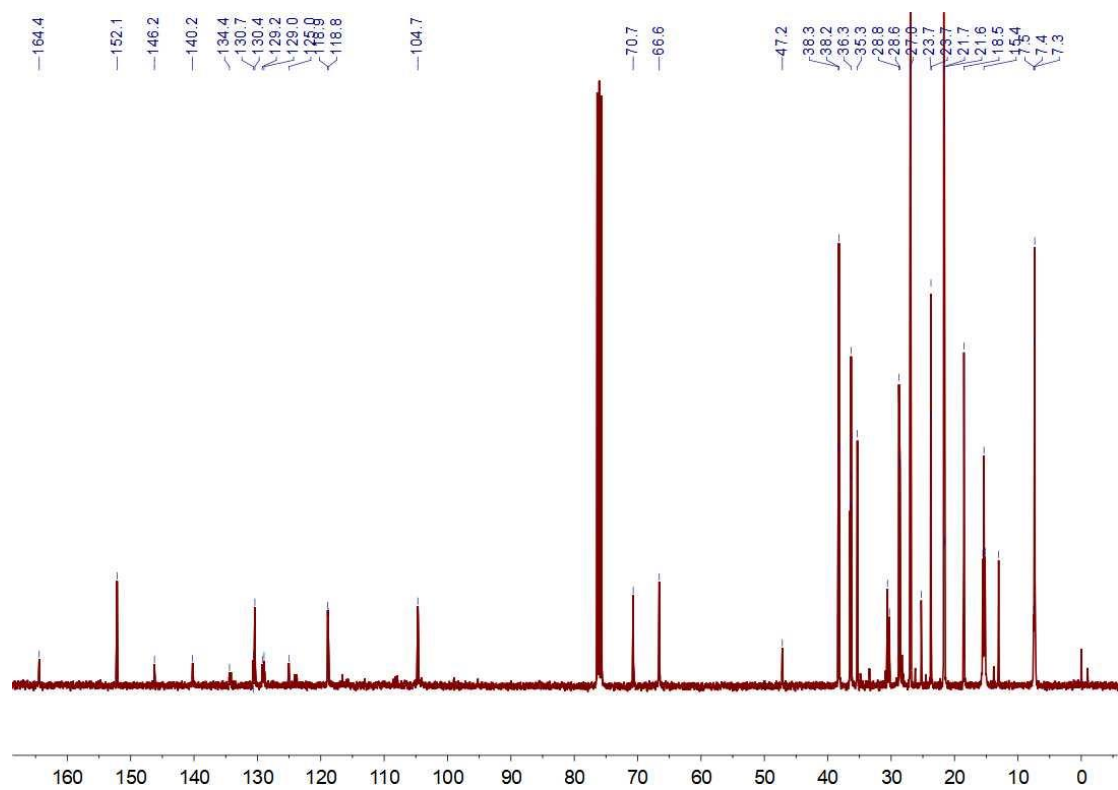

**Figure S34.**  $^{13}\text{C}$  NMR spectrum (100 MHz,  $\text{CDCl}_3$ , 298 K) of **1**.

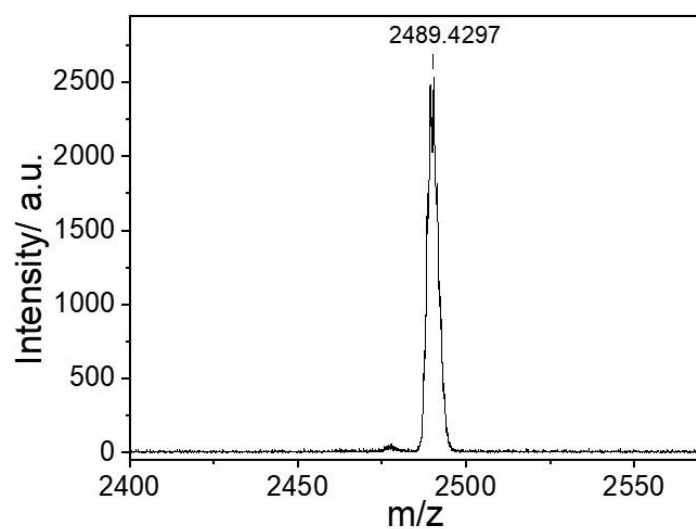

**Figure S35.** MALDI-TOF mass spectrum of **1**.

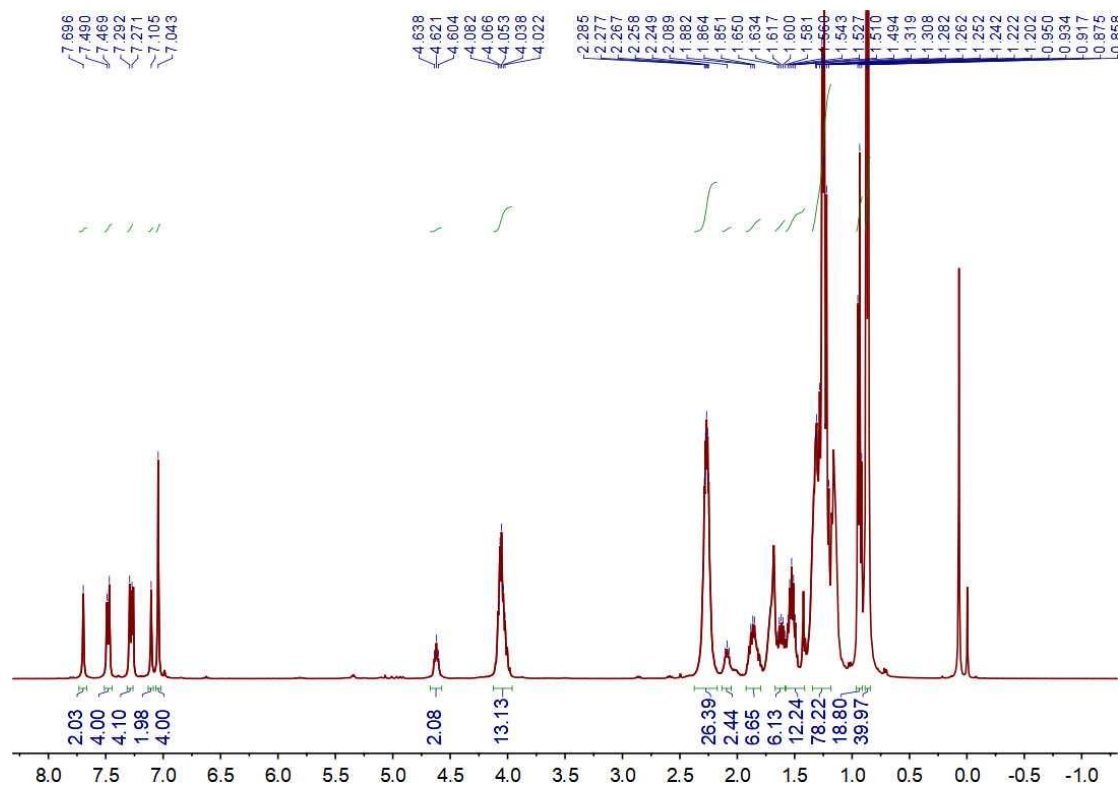

**Figure S36.** <sup>1</sup>H NMR spectrum (400 MHz, CDCl<sub>3</sub>, 298 K) of **2**.

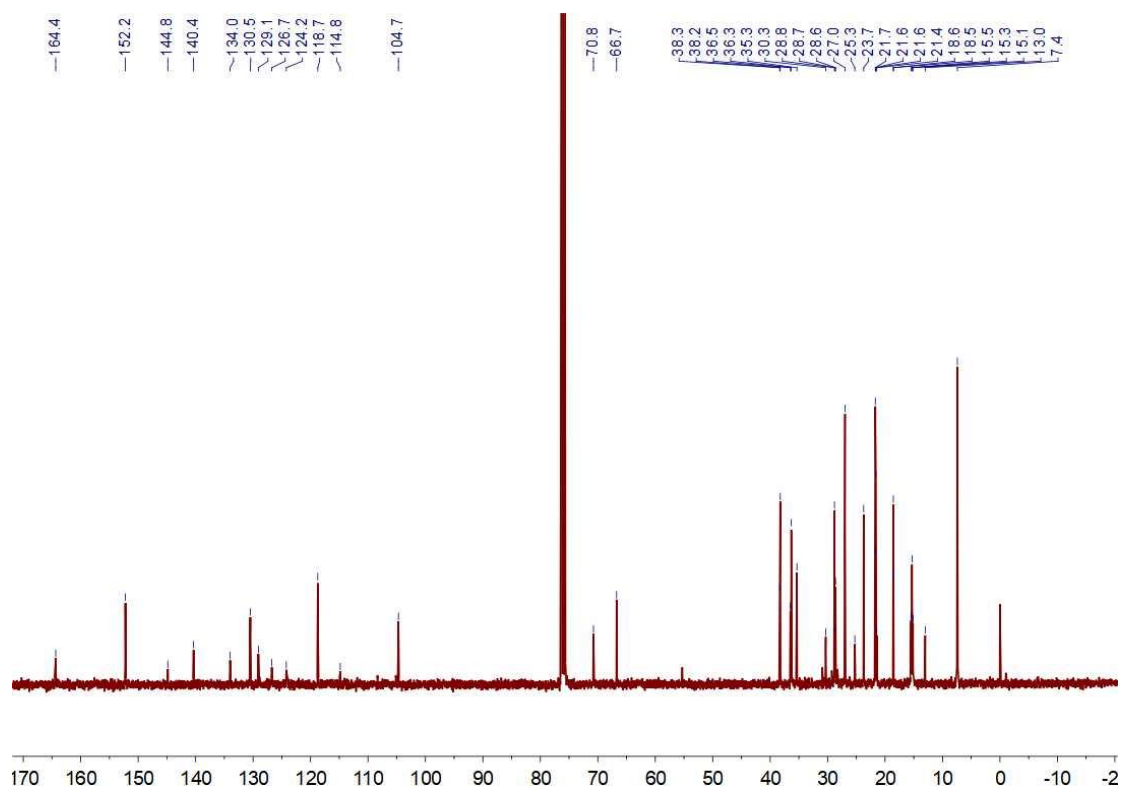

**Figure S37.**  $^{13}\text{C}$  NMR spectrum (100 MHz,  $\text{CDCl}_3$ , 298 K) of **2**.

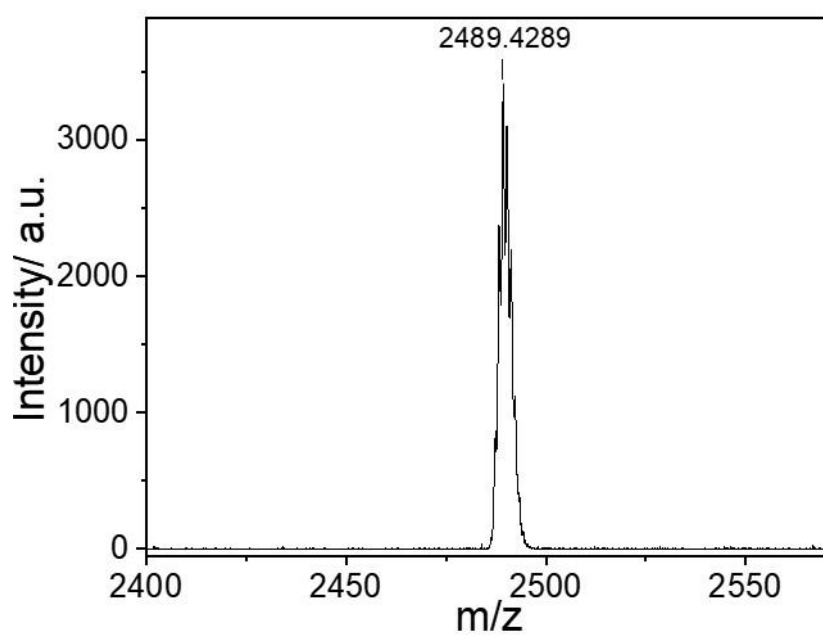

**Figure S38.** MALDI-TOF mass spectrum of **2**.
